# Supplementary material
Source: Springer Nature journal article supplement (https://www.springermedizin.de/resource/supplementary/12936_2008_828_MOESM1_ESM.pdf/9549016)

Pyronaridine

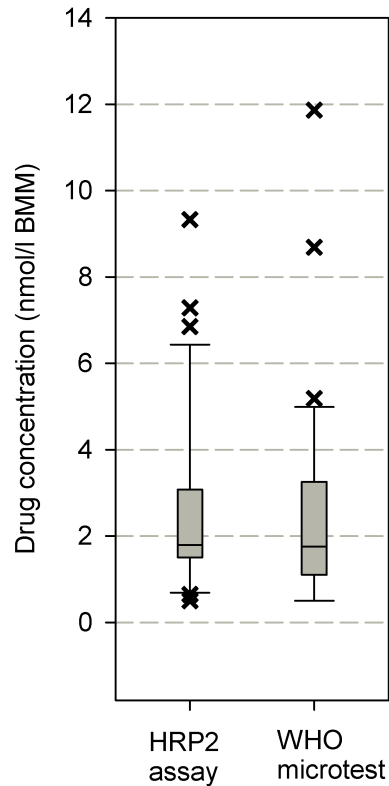

Chloroquine

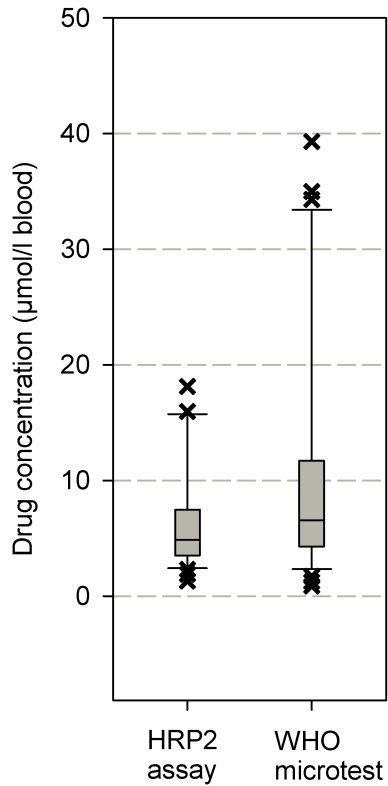

Artesunate

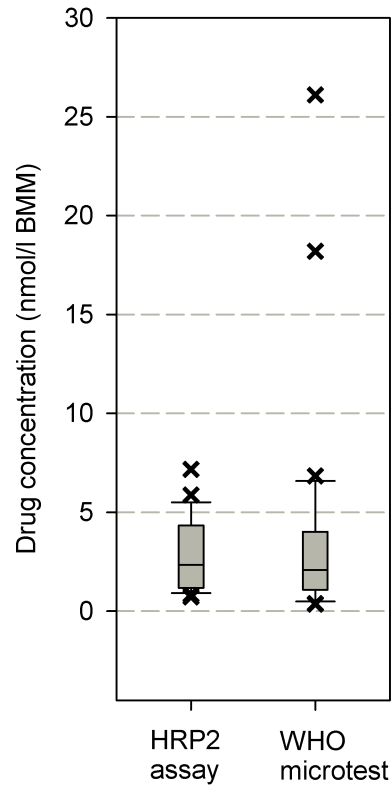

Quinine

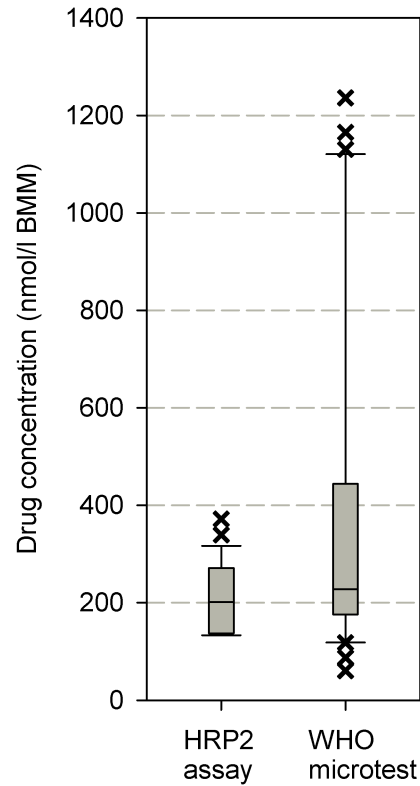

Supplement: MOESM1 [file 9549016]
